# Supplementary material
Source: PubMed Central journal article supplement (PMC1593171)
Supplement: mbc_E05-12-1174_1.pdf [file mbc_E05-12-1174_1.pdf]

## **SUPPLEMENTARY MATERIAL**

### **Supplementary Figure Legends**

#### **Supplementary Figure S1.**

Overexpression of mVENUS-Sec22b $\Delta$ TMD or mVENUS-VAMP3 $\Delta$ TMD inhibits phagocytosis in J774 macrophages.

(A) Green signals indicate mVENUS-tagged proteins stably expressed in J774 cells. The signals of mVENUS and mVENUS-Sec22b $\Delta$ TMD were distributed throughout the cells, but overexpression of VAMP3 $\Delta$ TMD produced some dot-like structures, as shown in the inset. *Bars*, 20  $\mu$ m. (B) Western blotting analysis of total lysates from J774 cells stably expressing mVENUS, mVENUS-Sec22b $\Delta$ TMD, and mVENUS-VAMP3 $\Delta$ TMD. Western blotting was carried out using antibodies against EGFP, Sec22B, and VAMP3. Asterisks (\*) denote non-specific band recognized by anti-VAMP3 antibodies (Affinity BioReagents, Inc., Golden, CO). (C) J774/mVENUS, J774/mVENUS-Sec22b $\Delta$ TMD, and J774/mVENUS-VAMP3 $\Delta$ TMD cells were incubated with luminol-bound microbeads. Chemiluminescence from cells that ingested the beads was measured on a TD-20/20 luminometer for 15 sec every 1 min at a 50.1% sensitivity level. The results are given in relative light units (RLUs). These results were normalized to the maximal value obtained for J774/mVENUS cells within the same experiment. Data presented are the mean  $\pm$  S.E. of three independent experiments.

#### **Supplementary Figure S2.**

Fraction of phagosomes labeled with LAMP-1 antibodies and with mVENUS-syntaxin 18.

(A) J774/mVENUS-syntaxin 18 cells were incubated with non-opsonized latex beads (3.0- $\mu$ m diameter) for 10, 20, 40, or 120 min. The cells were fixed with 4% paraformaldehyde for 20 min

at room temperature and permeabilized with 0.2% Triton X-100 for 30 min. Then the cells were stained with an anti-LAMP-1 antibody in combination with Alexa594-labeled secondary antibodies. Asterisks (\*) denote phagosomes in the cells that contain a latex bead. Phagosomes labeled with mVENUS-syntaxin 18 were classified into three types. Type-1 and type-3 indicate LAMP-1-negative and -positive phagosomes, respectively. Type-2 shows a phagosome partially detected by LAMP-1 signals. (B) Quantitation of each type of phagosome over time. Values are expressed as a percent of the total number of the three types of phagosomes (fifty phagosomes) at the indicated time points. Data presented are the mean  $\pm$  S.E. of three independent experiments. The rate of LAMP-1-positive phagosomes gradually increased within the first 40 min. This is consistent with the results in Figure 1 using J774 cells, suggesting that J774/mVENUS-syntaxin 18 cells have retained the normal phagocytic function of J774 cells.

### **Supplementary Figure S3.**

Electron micrographs of purified phagosomes and 0.8- $\mu$ m-diameter beads used for phagocytosis.

(A) Additional electron micrographs of purified phagosomes from the J774/mVENUS-syntaxin 18 cells described in Figure 7. We observed a mean of  $9.8 \pm 1.4$  gold particles on each phagosome ( $n = 20$ ) whose major axis is in the 720 to 900 nm range. (B) In contrast, no significant gold signal was detected on phagosomes from J774 cells ( $n = 50$ ). (C) The electron microscopic experiment was performed on 0.8- $\mu$ m-diameter beads alone as a control. No structure was detected on the bead, suggesting that visible structures surrounding the bead in (A) and (B) are truly phagosomal membranes. *Bars*, 200 nm.

**Supplementary Figure S4.**

No difference was observed in the shape and size of J774 cells expressing mVENUS and mVENUS-syntaxin 18.

Green signals indicate mVENUS-tagged proteins expressed in J774 cells. Differential interference contrast (DIC) images indicate the cell shape and size. *Bars*, 10  $\mu\text{m}$ .

**Supplementary Figure S5.**

J774/mVENUS-syntaxin 18 cells enhance the rate of phagocytosis in a Texas Red-conjugated zymosan A (*S. cerevisiae*) assay. J774/mVENUS and J774/mVENUS-syntaxin 18 cells were incubated with Texas Red-conjugated zymosan particles for the indicated times in the presence (+) and absence (-) of cytochalasin B (final concentration 10  $\mu\text{M}$ ). The cells were washed thoroughly with PBS to remove free particles and fixed. Quantitation of each image is summarized in Figure 7E. *Bar*, 20  $\mu\text{m}$ .

**A**

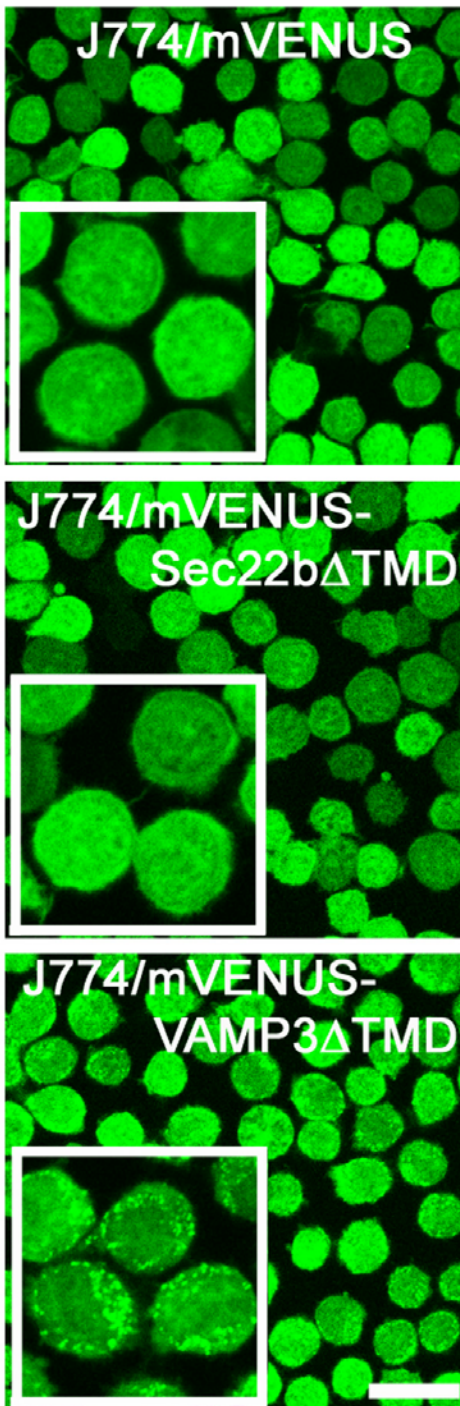

**B**

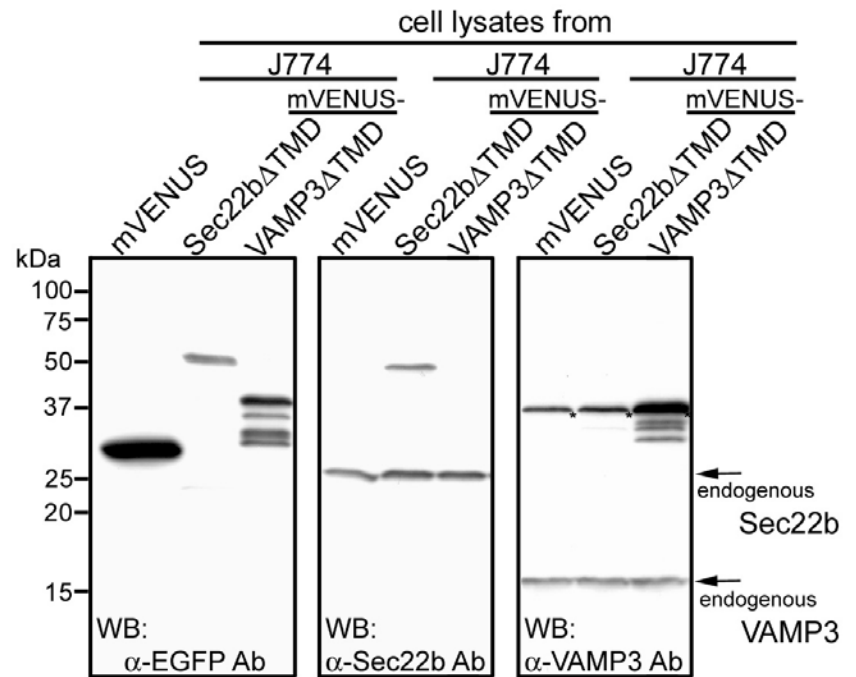

**C**

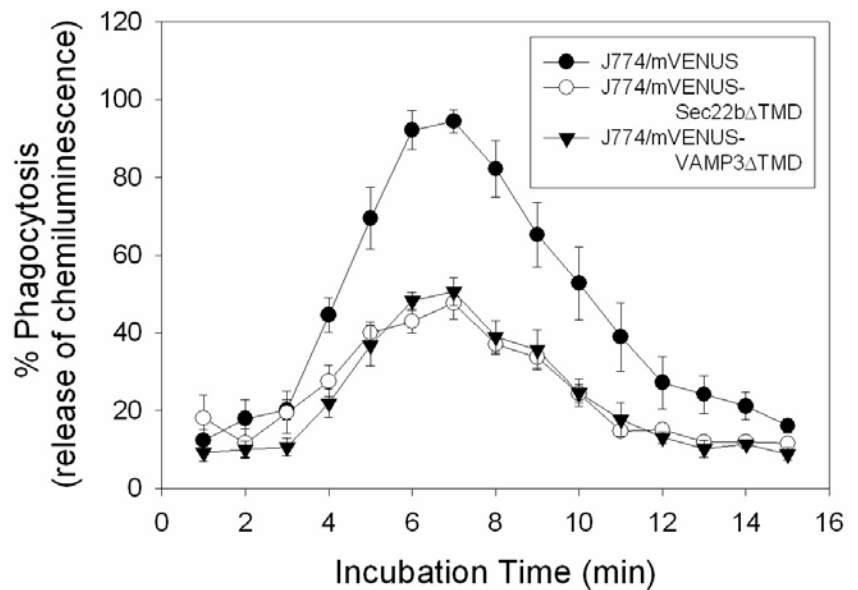

Supplementary Figure S1. Hatsuzawa *et al.*

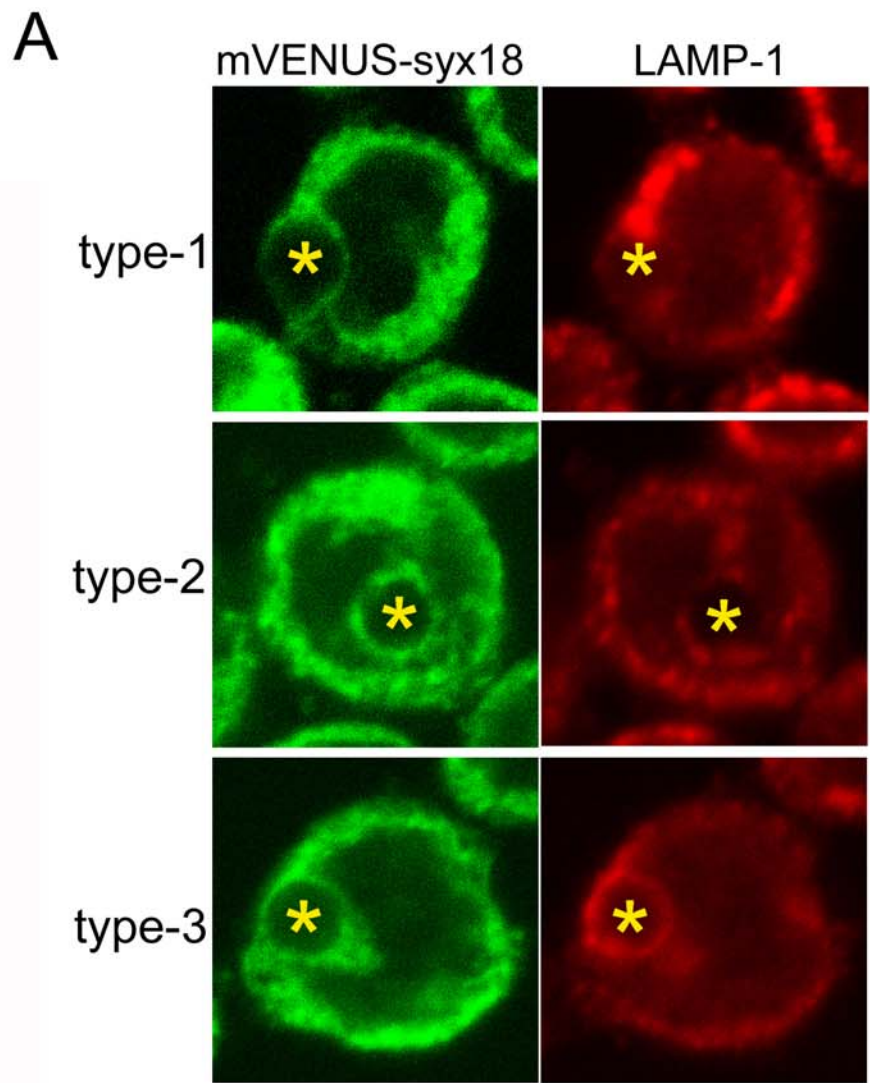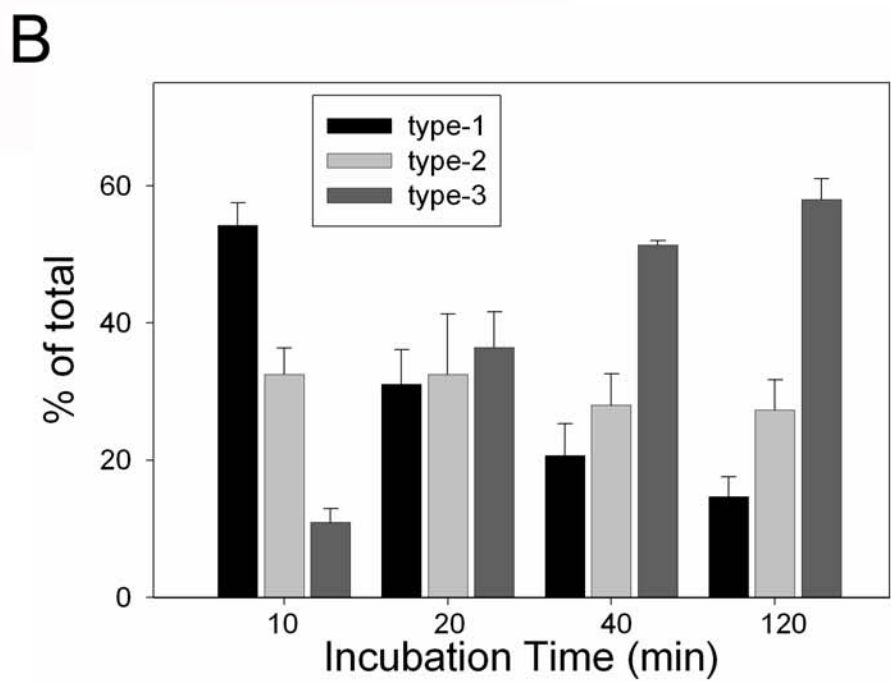

Supplementary Figure S2. Hatsuzawa *et al.*

A

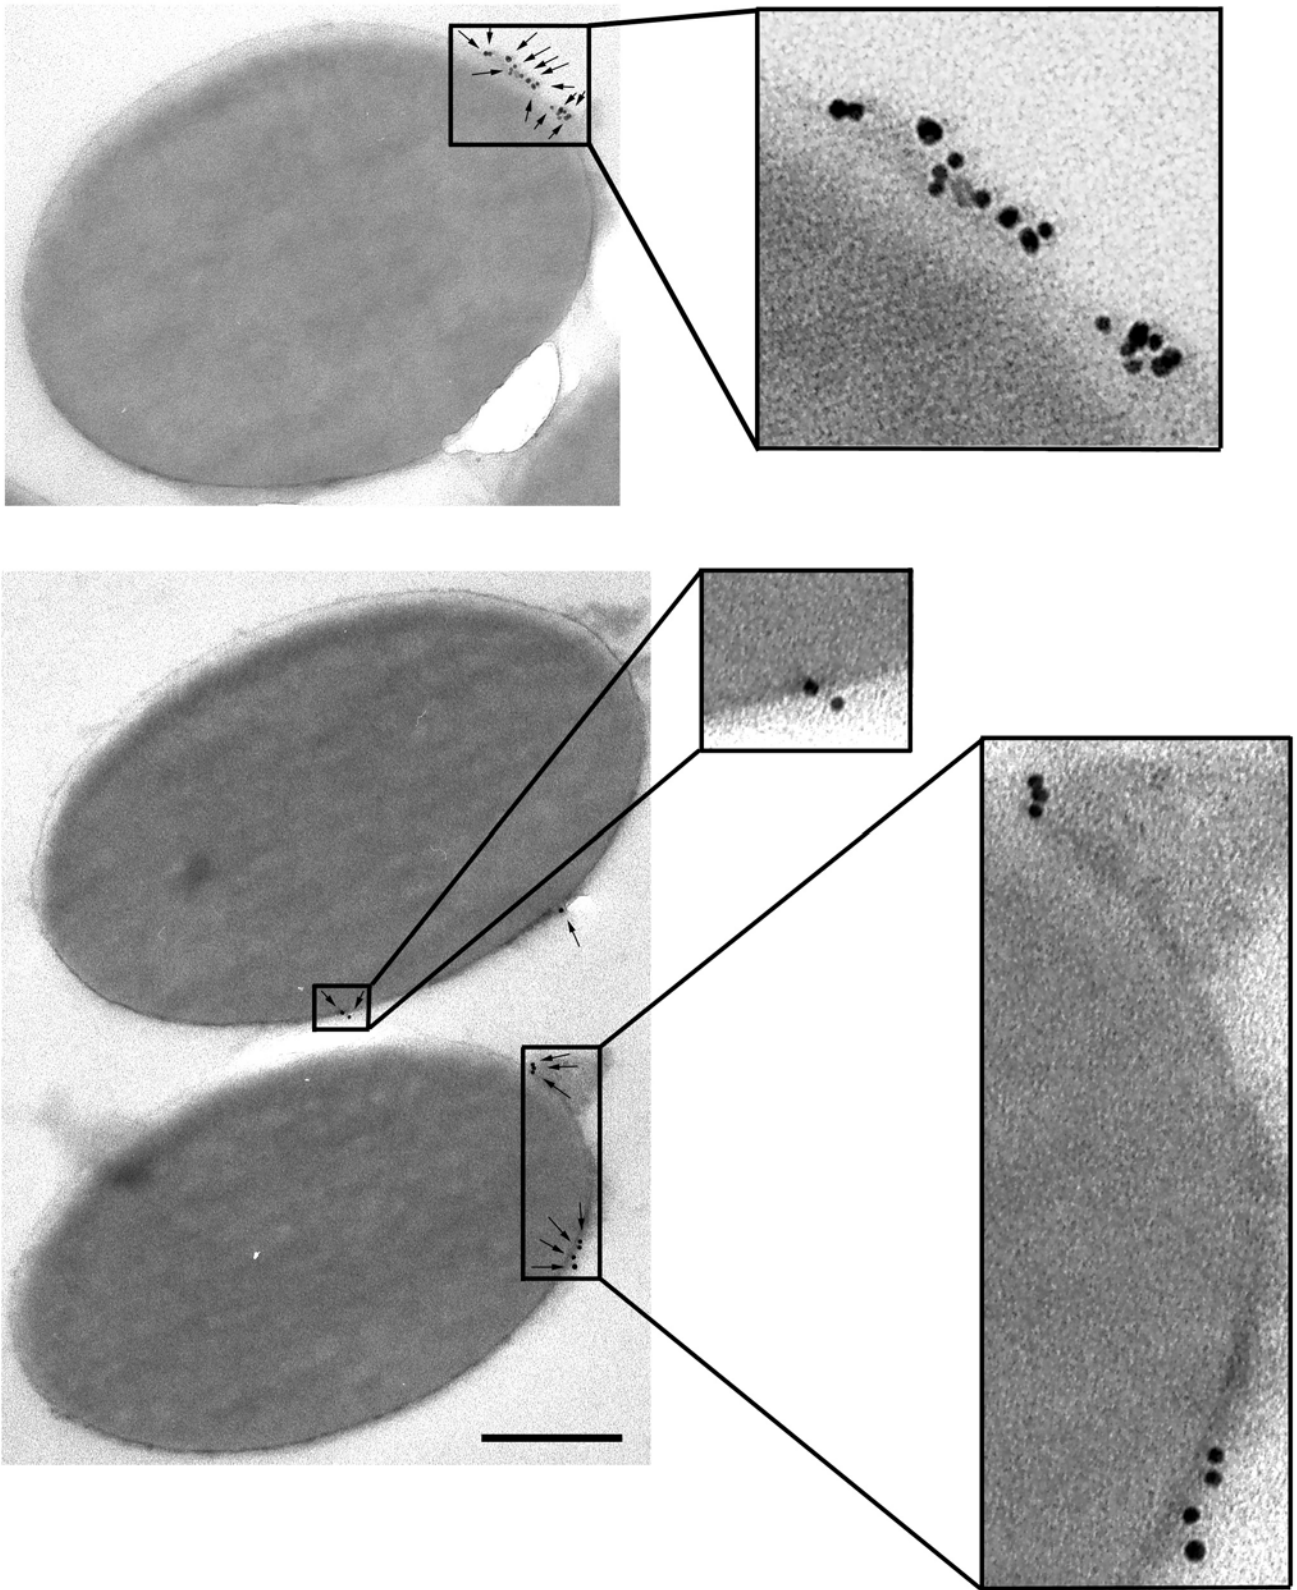

Supplementary Figure S3. Hatsuzawa *et al.*

B

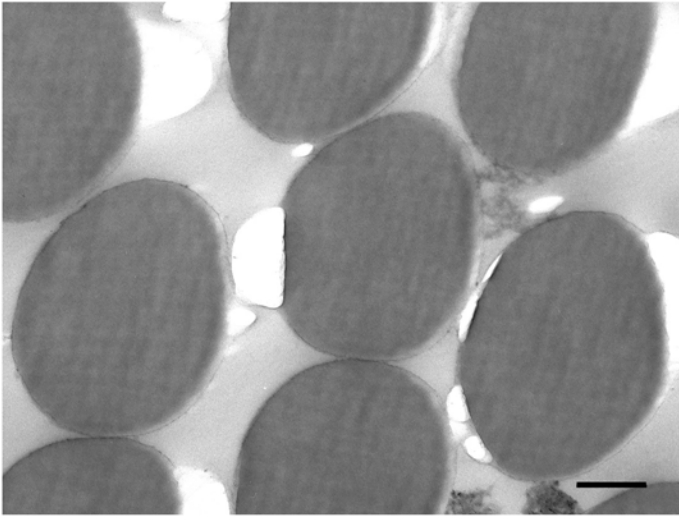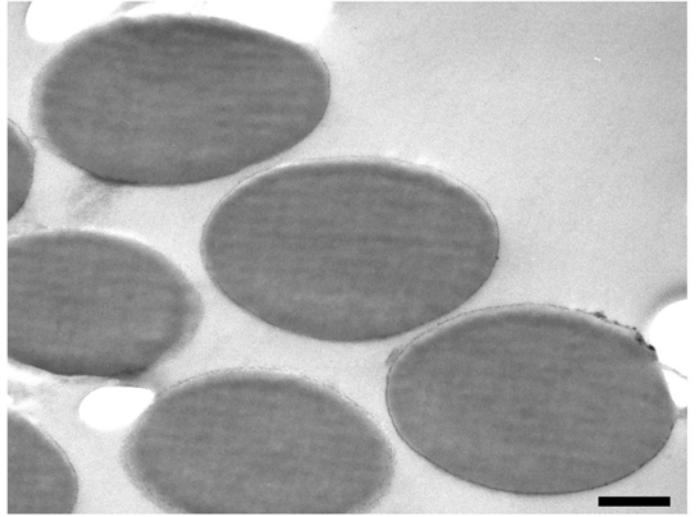

C

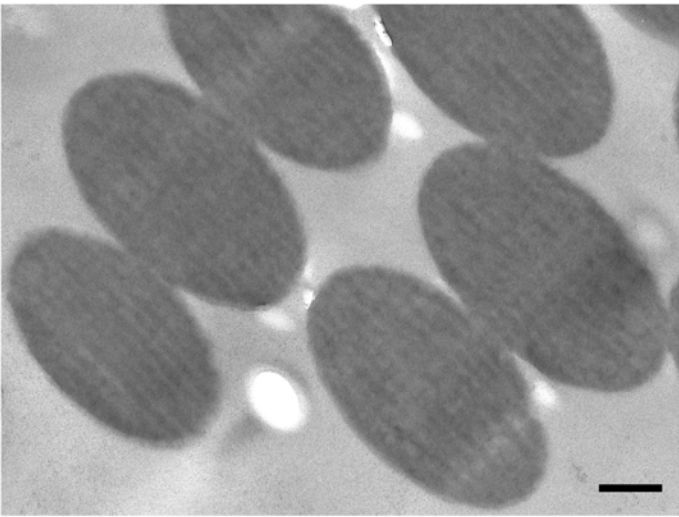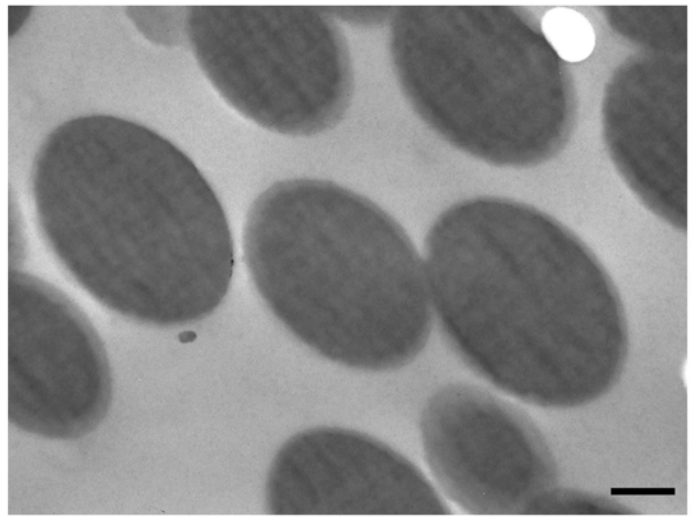

Supplementary Figure S3. Hatsuzawa *et al.*



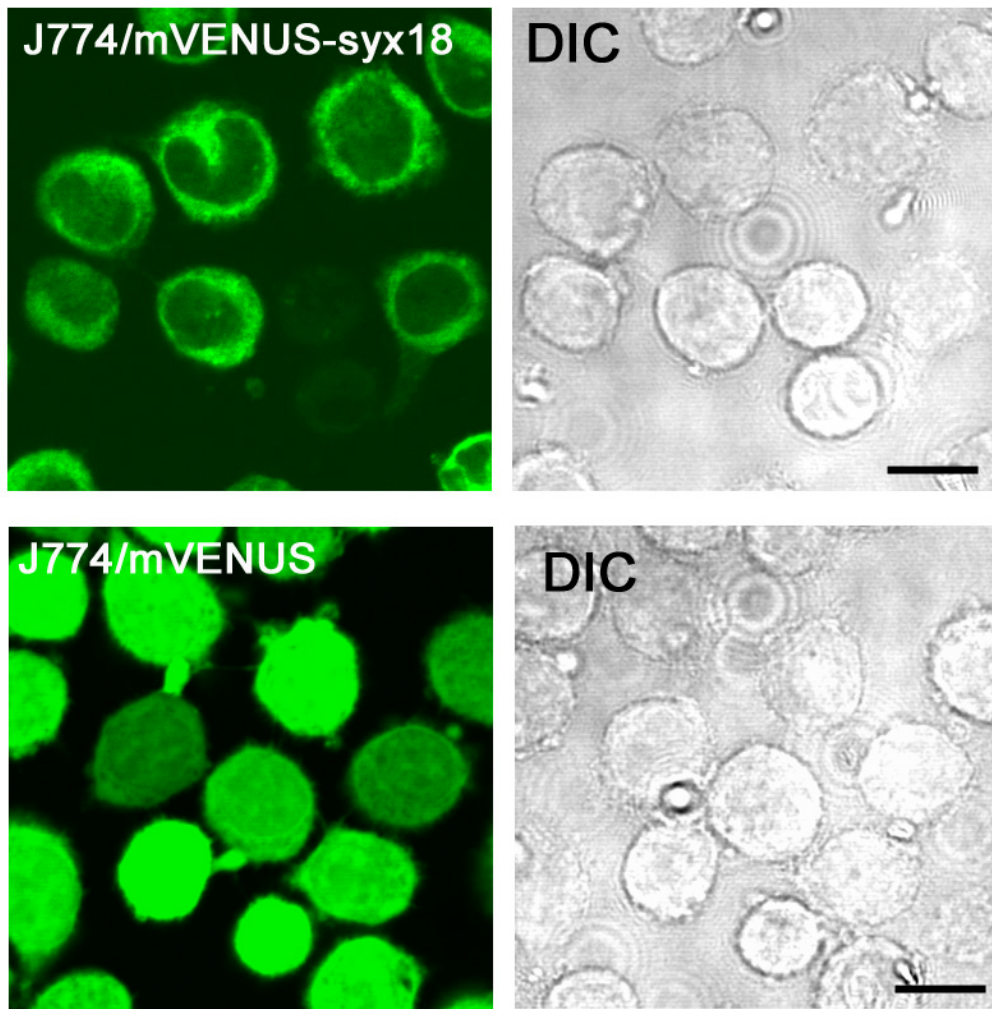

Supplementary Figure S4. Hatsuzawa *et al.*



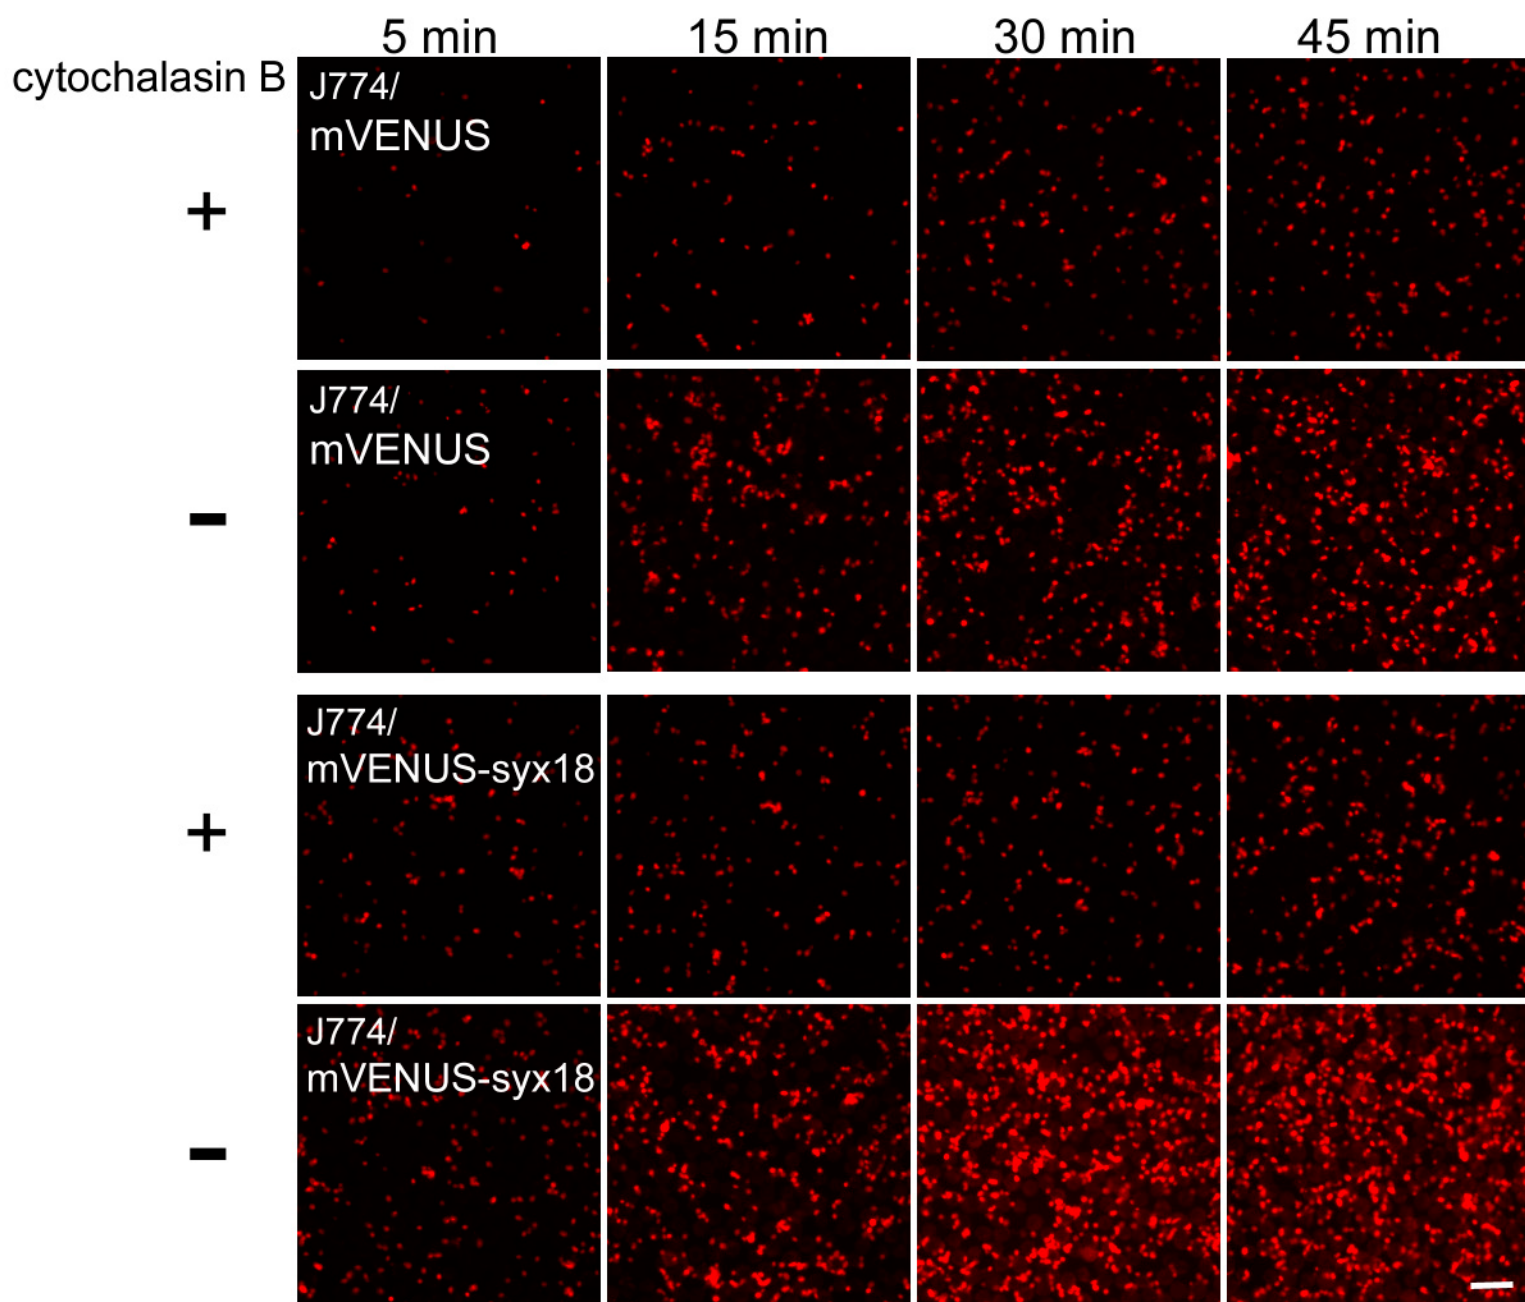

Supplementary Figure S5. Hatsuzawa *et al.*
